# Supplementary material
Source: PubMed Central journal article supplement (PMC2234057)
Supplement: blood_blood-2007-07-100115_2.pdf [file blood_blood-2007-07-100115_2.pdf]

| Cell line | EC50 ( $\mu$ M) |
|-----------|-----------------|
| LY7       | 0.8             |
| LY1       | 0.9             |
| LY10      | 0.9             |
| LY3       | 1.0             |
| DHL6      | 1.1             |
| DHL4      | 1.2             |
| LY18      | 1.5             |
| Wsu-NHL   | 1.5             |
| DHL10     | 2.1             |
| Pfeiffer  | 2.4             |
| Karpas422 | 4.2             |
| Toledo    | 4.3             |
| DHL8      | 4.7             |
| LY19      | 5.9             |
| LY4       | 8.1             |
