# Supplementary material
Source: PubMed Central journal article supplement (PMC2234057)
Supplement: blood_blood-2007-07-100115_3.pdf [file blood_blood-2007-07-100115_3.pdf]

| <b>Cell line</b> | <b>Comprehensive Cluster</b> |
|------------------|------------------------------|
| DHL4             | BCR                          |
| Ly7              | BCR                          |
| Ly3              | BCR                          |
| DHL6             | BCR                          |
| Ly10             | BCR                          |
| DHL10            | BCR                          |
| Wsu-NHL          | BCR                          |
| Ly18             | BCR                          |
| LY1              | BCR                          |
| DHL8             | BCR                          |
| Pfeiffer         | OxP                          |
| Toledo           | OxP                          |
| Ly4              | OxP                          |
| Karpas422        | OxP                          |
| LY19             | HR                           |
